# Supplementary material
Source: HighWire-hosted journal article supplement (https://bmjopen.bmj.com/content/12/4/e058737)
Supplement: inline-supplementary-material-1 [file inline-supplementary-material-1.pdf]

## ONLINE SUPPLEMENTAL APPENDIX

| Database searched                              | via              | Years of coverage |
|------------------------------------------------|------------------|-------------------|
| Embase                                         | Embase.com       | 1971 - Present    |
| Medline ALL                                    | Ovid             | 1946 - Present    |
| Web of Science Core Collection*                | Web of Knowledge | 1975 - Present    |
| Cochrane Central Register of Controlled Trials | Wiley            | 1992 - Present    |
| PsycINFO                                       | Ovid             | 1806 - Present    |

\*Science Citation Index Expanded (1975-present) ; Social Sciences Citation Index (1975-present); Arts & Humanities Citation Index (1975-present) ; Conference Proceedings Citation Index- Science (1990-present); Conference Proceedings Citation Index- Social Science & Humanities (1990-present) ; Emerging Sources Citation Index (2015-present)

**Embase.com**

(exercise/exp OR 'physical activity'/de OR Climbing/exp OR running/exp OR walking/exp OR 'cycling'/de OR 'fighting'/de OR 'jogging'/de OR 'jumping'/de OR 'lifting effort'/de OR 'nordic walking'/de OR 'racewalking'/de OR 'stretching'/de OR 'swimming'/de OR 'weight bearing'/de OR 'weight lifting'/de OR sport/exp OR 'motor activity'/de OR 'psychomotor activity'/de OR 'physical education'/de OR locomotion/de OR swimming/de OR walking/exp OR (((physical\* OR motor\* OR psychomotor\*) NEAR/3 (activit\*)) OR exercise\* OR sport\* OR (physical NEAR/3 (education OR training)) OR locomotion\* OR (Endurance NEAR/3 Training) OR walking OR running OR jogging OR yoga OR taichi OR tai-chi OR martial-art\* OR qigong OR ((aerobic OR resistance OR physical\*) NEAR/3 training)):ab,ti) AND (depression/exp OR 'anxiety disorder'/exp OR anxiety/de OR 'somatic symptom'/de OR 'attention deficit disorder'/de OR 'internalizing disorder'/de OR 'internalization (behavior)'/de OR 'externalizing disorder'/de OR 'externalization (behavior)'/de OR 'conduct disorder'/de OR 'rule breaking behavior'/de OR 'disruptive behavior'/exp OR (depressi\* OR anxiet\* OR (somatic\* NEAR/3 symptom\*) OR (attention NEAR/3 deficit NEAR/3 (disorder\* OR hyperactiv\* OR problem\*)) OR (hyperactivit\* NEAR/3 problem\*) OR adhd OR internalizing OR internalization\* OR internalising OR internalisation\* OR externalizing OR externalization\* OR externalising OR externalisation\* OR (conduct NEAR/3 (disorder\* OR problem\*)) OR (rule\* NEAR/3 breaking NEAR/3 behav\*) OR ((disrupt\* OR problem\*) NEAR/3 behav\*)):ab,ti) AND ('nuclear magnetic resonance imaging'/exp OR 'diffusion tensor imaging'/exp OR electroencephalography/exp OR electroencephalogram/exp OR 'gray matter'/exp OR 'white matter'/exp OR 'nervous system development'/exp OR 'nerve cell plasticity'/exp OR 'biological marker'/de OR marker/de OR hormone/exp OR peptide/exp OR protein/exp OR neurotransmitter/de OR opiate/de OR serotonin/de OR 'serotonin level'/exp OR noradrenalin/de OR dopamine/de OR monoamine/de OR endorphin/de OR neuroimmunology/de OR 'growth factor'/exp OR 'brain derived neurotrophic factor'/de OR 'neurotrophin gene'/de OR vasculotropin/de OR 'BOLD signal'/de OR volumetry/de OR 'brain function'/de OR 'functional connectivity'/de OR 'brain asymmetry'/de OR 'brain metabolism'/de OR 'brain structure'/de OR 'inflammatory marker'/de OR 'event related brain potential'/de OR 'emotional intelligence'/de OR 'social interaction'/de OR 'self esteem'/exp OR 'self control'/exp OR 'social connectedness'/exp OR 'self acceptance'/exp OR 'personal autonomy'/de OR belongingness/de OR confidence/de OR 'self confidence'/de OR 'self concept'/de OR (mri OR (magnetic NEAR/3 resonance) OR (diffusion NEAR/3 tensor NEAR/3 imag\*) OR electroencephalogra\* OR eeg OR ((grey OR gray OR white) NEXT/1 matter\*) OR (nervous-system\* NEAR/3 development\*) OR neurogenesis\* OR ((nerv\*-cell\* OR Neuron\*) NEAR/3 plasticit\*) OR hormon\* OR peptide\* OR protein\* OR neurotransmitter\* OR opiate\* OR opioid\* OR serotonin\* OR noradrenalin\* OR norepinephrin\* OR dopamin\* OR monoamin\* OR endorphin\* OR neuroimmunolo\* OR neuro-immunolo\* OR growth-factor\* OR (brain-deriv\* NEAR/3 neurotroph\*-factor\*) OR neurotrophin\*-gene\* OR IGF1 OR IGF-1 OR vasculotropin\* OR VEGF OR BDNF OR VBM OR BOLD-signal\* OR (blood-oxygen NEAR/3 level\* NEAR/3

dependent\*) OR volumetr\* OR (brain NEAR/3 (function\* OR asymmetry\* OR metabol\* OR structure\*)) OR (functional\* NEAR/3 connectiv\*) OR (event-related NEAR/3 brain-potential\*) OR ((emotion\* OR psycholog\*) NEAR/3 (intelligen\* OR adjustment\* OR regulation\*)) OR (social\* NEAR/3 (interacti\* OR connected\*)) OR (self NEXT/1 (esteem OR control\* OR acceptan\* OR awareness\* OR concept OR efficac\*)) OR (psychologic\* NEAR/3 need\*) OR autonom\* OR belongingness\* OR (perceived NEAR/3 abilit\*) OR (confidence NOT (confidence-interval\*)):ab,ti) AND ('intervention study'/de OR 'clinical trial'/exp OR randomization/exp OR 'prospective study'/exp OR 'longitudinal study'/exp OR 'cohort analysis'/de OR 'follow up'/de OR 'cross-sectional study'/de OR 'major clinical study'/de OR (intervention\* OR trial\* OR random\* OR rct OR prospective\* OR longitudinal\* OR cohort\* OR follow-up\* OR cross-section\*):ab,ti) NOT ([animals]/lim NOT [humans]/lim) NOT (patient/exp/mj OR athlete/exp/mj OR 'breathing exercise'/mj OR 'degenerative disease'/exp/mj OR neoplasm/exp/mj OR 'cerebrovascular disease'/exp/mj OR 'cardiovascular disease'/exp/mj OR 'musculoskeletal disease'/exp/mj OR pain/exp/mj OR surgery/exp/mj OR survivor/exp/mj OR diabetes/exp/mj OR (patient\* OR athlete\* OR breathing OR disease\* OR Alzheimer\* OR Parkinson\* OR osteoarthritis\* OR cancer OR neoplas\* OR stroke OR cva OR cerebrovascular OR cardiovascular OR musculoskeletal OR pain OR disorder\* OR surger\* OR transplant\* OR survivor\* OR diabet\* OR injur\*):ti) NOT [conference abstract]/lim NOT ('systematic review'/de OR 'meta analysis'/de OR 'case report'/de OR ((systematic\* NEAR/3 review\*) OR meta-analys\* OR case-report\*):Ab,ti)

### Medline ALL Ovid

(Exercise/ OR Climbing/ OR Running/ OR Walking/ OR Bicycling/ OR Jogging/ OR Weight-Bearing/ OR Weight Lifting/ OR exp Sports/ OR Motor Activity/ OR "Physical Education and Training"/ OR Locomotion/ OR Swimming/ OR (((physical\* OR motor\* OR psychomotor\*) ADJ3 (activit\*)) OR exercise\* OR sport\* OR (physical ADJ3 (education OR training)) OR locomotion\* OR (Endurance ADJ3 Training) OR walking OR running OR jogging OR yoga OR taichi OR tai-chi OR martial-art\* OR qigong OR ((aerobic OR resistance OR physical\*) ADJ3 training)).ab,ti.) AND (exp Depressive Disorder/ OR Depression/ OR exp Anxiety Disorders/ OR Anxiety/ OR Medically Unexplained Symptoms/ OR exp "Attention Deficit and Disruptive Behavior Disorders"/ OR Conduct Disorder/ OR Problem Behavior/ OR (depressi\* OR anxiet\* OR (somatic\* ADJ3 symptom\*) OR (attention ADJ3 deficit ADJ3 (disorder\* OR hyperactiv\* OR problem\*)) OR (hyperactivit\* ADJ3 problem\*) OR adhd OR internalizing OR internalization\* OR internalising OR internalisation\* OR externalizing OR externalization\* OR externalising OR externalisation\* OR (conduct ADJ3 (disorder\* OR problem\*)) OR (rule\* ADJ3 breaking ADJ3 behav\*) OR ((disrupt\* OR problem\*) ADJ3 behav\*)).ab,ti.) AND (exp Magnetic Resonance Imaging/ OR exp Diffusion Tensor Imaging/ OR Electroencephalography/ OR Gray Matter/ OR White Matter/ OR Biomarkers/ OR Hormones/ OR Peptides/ OR Proteins/ OR Neurotransmitter Agents/ OR Opiate Alkaloids/ OR Serotonin/ OR Norepinephrine/ OR Dopamine/ OR Endorphins/ OR Opioid Peptides/ OR Intercellular Signaling Peptides and Proteins/ OR Brain-Derived Neurotrophic Factor/ OR Vascular Endothelial Growth Factor A/ OR BOLD signal/ OR Emotional Intelligence/ OR Social Interaction/ OR Self-Control/ OR Personal Autonomy/ OR Self Concept/ OR (mri OR (magnetic ADJ3 resonance) OR (diffusion ADJ3 tensor ADJ3 imag\*) OR electroencephalogra\* OR eeg OR ((grey OR gray OR white) ADJ matter\*) OR (nervous-system\* ADJ3 development\*) OR neurogenesis\* OR ((nerv\*-cell\* OR Neuron\*) ADJ3 plasticit\*) OR hormon\* OR peptide\* OR protein\* OR neurotransmitter\* OR opiate\* OR opioid\* OR serotonin\* OR noradrenalin\* OR norepinephrin\* OR dopamin\* OR monoamin\* OR endorphin\* OR neuroimmunolo\* OR neuro-immunolo\* OR growth-factor\* OR (brain-deriv\* ADJ3 neurotroph\*-factor\*) OR neurotrophin\*-gene\* OR IGF1 OR IGF-1 OR vasculotropin\* OR VEGF OR BDNF OR VBM OR BOLD-signal\* OR (blood-oxygen ADJ3 level\* ADJ3 dependent\*) OR volumetr\* OR (brain ADJ3 (function\* OR asymmetry\* OR metabol\* OR structure\*)) OR (functional\* ADJ3 connectiv\*) OR (event-related ADJ3 brain-potential\*) OR ((emotion\* OR psycholog\*) ADJ3 (intelligen\* OR adjustment\* OR regulation\*)) OR (social\* ADJ3 (interacti\* OR connected\*)) OR (self ADJ (esteem OR control\* OR acceptan\*

OR awareness\* OR concept OR efficac\*) OR (psychologic\* ADJ3 need\*) OR autonom\* OR belongingness\* OR (perceived ADJ3 abilit\*) OR (confidence NOT (confidence-interval\*)),ab,ti.) AND (exp Clinical Trial/ OR Random Allocation/ OR exp Cohort Studies/ OR Cross-Sectional Studies/ OR (intervention\* OR trial\* OR random\* OR rct OR prospective\* OR longitudinal\* OR cohort\* OR follow-up\* OR cross-section\*).ab,ti.) NOT (exp animals/ NOT humans/) NOT (exp \* Patients/ OR exp \* Athletes/ OR \* Breathing Exercises/ OR exp \* Neoplasms/ OR exp \* Cerebrovascular Disorders/ OR exp \* Cardiovascular Diseases/ OR exp \* Musculoskeletal Diseases/ OR \*exp Pain/ OR exp \* Surgical Procedures, Operative/ OR exp \* Survivors/ OR \*exp Diabetes Mellitus/ OR (patient\* OR athlete\* OR breathing OR disease\* OR Alzheimer\* OR Parkinson\* OR osteoarthritis\* OR cancer OR neoplas\* OR stroke OR cva OR cerebrovascular OR cardiovascular OR musculoskeletal OR pain OR disorder\* OR surger\* OR transplant\* OR survivor\* OR diabet\* OR injur\*).ti.) NOT (Systematic Review/ OR Meta-Analysis/ OR case report/ OR ((systematic\* ADJ3 review\*) OR meta-analys\* OR case-report\*).ab,ti.)

### PSycINFO ALL Ovid

(exp Exercise/ OR Physical Activity/ OR exp Sports/ OR (((physical\* OR motor\* OR psychomotor\*) ADJ3 (activit\*)) OR exercise\* OR sport\* OR (physical ADJ3 (education OR training)) OR locomotion\* OR (Endurance ADJ3 Training) OR walking OR running OR jogging OR yoga OR taichi OR tai-chi OR martial-art\* OR qigong OR ((aerobic OR resistance OR physical\*) ADJ3 training)).ab,ti.) AND (exp Major Depression/ OR "Depression (Emotion)"/ OR exp Anxiety Disorders/ OR Anxiety/ OR exp Attention Deficit Disorder with Hyperactivity / OR Conduct Disorder/ OR Behavior Problems / OR (depressi\* OR anxiet\* OR (somatic\* ADJ3 symptom\*) OR (attention ADJ3 deficit ADJ3 (disorder\* OR hyperactiv\* OR problem\*)) OR (hyperactivit\* ADJ3 problem\*) OR adhd OR internalizing OR internalization\* OR internalising OR internalisation\* OR externalizing OR externalization\* OR externalising OR externalisation\* OR (conduct ADJ3 (disorder\* OR problem\*)) OR (rule\* ADJ3 breaking ADJ3 behav\*) OR ((disrupt\* OR problem\*) ADJ3 behav\*).ab,ti.) AND (exp Magnetic Resonance Imaging/ OR exp Diffusion Tensor Imaging/ OR Electroencephalography/ OR Gray Matter/ OR White Matter/ OR Biological Markers / OR Hormones/ OR Peptides/ OR Proteins/ OR Neurotransmitters / OR Opiates / OR Serotonin/ OR Norepinephrine/ OR Dopamine/ OR Endorphins/ OR Brain Derived Neurotrophic Factor / OR Emotional Intelligence/ OR Social Interaction/ OR Self-Control/ OR Autonomy/ OR Self-Concept/ OR (mri OR (magnetic ADJ3 resonance) OR (diffusion ADJ3 tensor ADJ3 imag\*) OR electroencephalogra\* OR eeg OR ((grey OR gray OR white) ADJ3 matter\*) OR (nervous-system\* ADJ3 development\*) OR neurogenesis\* OR ((nerv\*-cell\* OR Neuron\*) ADJ3 plasticit\*) OR hormon\* OR peptide\* OR protein\* OR neurotransmitter\* OR opiate\* OR opioid\* OR serotonin\* OR noradrenalin\* OR norepinephrin\* OR dopamin\* OR monoamin\* OR endorphin\* OR neuroimmunolo\* OR neuro-immunolo\* OR growth-factor\* OR (brain-deriv\* ADJ3 neurotroph\*-factor\*) OR neurotrophin\*-gene\* OR IGF1 OR IGF-1 OR vasculotropin\* OR VEGF OR BDNF OR VBM OR BOLD-signal\* OR (blood-oxygen ADJ3 level\* ADJ3 dependent\*) OR volumetr\* OR (brain ADJ3 (function\* OR asymmetry\* OR metabol\* OR structure\*)) OR (functional\* ADJ3 connectiv\*) OR (event-related ADJ3 brain-potential\*) OR ((emotion\* OR psycholog\*) ADJ3 (intelligen\* OR adjustment\* OR regulation\*)) OR (social\* ADJ3 (interacti\* OR connected\*)) OR (self ADJ (esteem OR control\* OR acceptan\* OR awareness\* OR concept OR efficac\*)) OR (psychologic\* ADJ3 need\*) OR autonom\* OR belongingness\* OR (perceived ADJ3 abilit\*) OR (confidence NOT (confidence-interval\*)),ab,ti.) AND (exp Clinical Trials / OR exp Cohort Analysis / OR (intervention\* OR trial\* OR random\* OR rct OR prospective\* OR longitudinal\* OR cohort\* OR follow-up\* OR cross-section\*).ab,ti.) NOT (exp animals/ NOT humans/) NOT (exp \* Patients/ OR exp \* Athletes/ OR exp \* Neoplasms/ OR exp \* Cerebrovascular Disorders/ OR exp \* Cardiovascular Disorders / OR exp \* Musculoskeletal Disorders / OR \*exp Pain/ OR exp \* Surgery / OR exp \* Survivors/ OR \*exp Diabetes Mellitus/ OR (patient\* OR athlete\* OR breathing OR disease\* OR Alzheimer\* OR Parkinson\* OR osteoarthritis\* OR cancer OR neoplas\* OR stroke OR cva OR cerebrovascular OR cardiovascular OR musculoskeletal OR pain OR disorder\* OR surger\* OR

transplant\* OR survivor\* OR diabet\* OR injur\*).ti.) NOT ("Systematic Review"/ OR Meta Analysis/ OR case report/ OR ((systematic\* ADJ3 review\*) OR meta-analys\* OR case-report\*).ab,ti.)

### Cochrane CENTRAL register of Trials

(((((physical\* OR motor\* OR psychomotor\*) NEAR/3 (activit\*)) OR exercise\* OR sport\* OR (physical NEAR/3 (education OR training)) OR locomotion\* OR (Endurance NEAR/3 Training) OR walking OR running OR jogging OR yoga OR taichi OR tai NEXT chi OR martial NEXT art\* OR qigong OR ((aerobic OR resistance OR physical\*) NEAR/3 training)):ab,ti) AND ((depressi\* OR anxiet\* OR (somatic\* NEAR/3 symptom\*) OR (attention NEAR/3 deficit NEAR/3 (disorder\* OR hyperactiv\* OR problem\*)) OR (hyperactivit\* NEAR/3 problem\*) OR adhd OR internalizing OR internalization\* OR internalising OR internalisation\* OR externalizing OR externalization\* OR externalising OR externalisation\* OR (conduct NEAR/3 (disorder\* OR problem\*)) OR (rule\* NEAR/3 breaking NEAR/3 behav\*) OR ((disrupt\* OR problem\*) NEAR/3 behav\*)):ab,ti) AND ((mri OR (magnetic NEAR/3 resonance) OR (diffusion NEAR/3 tensor NEAR/3 imag\*) OR electroencephalogra\* OR eeg OR ((grey OR gray OR white) NEXT/1 matter\*) OR (nervous NEXT system\* NEAR/3 development\*) OR neurogenesis\* OR ((nerv\* NEXT cell\* OR Neuron\*) NEAR/3 plasticit\*) OR hormon\* OR peptide\* OR protein\* OR neurotransmitter\* OR opiate\* OR opioid\* OR serotonin\* OR noradrenalin\* OR norepinephrin\* OR dopamin\* OR monoamin\* OR endorphin\* OR neuroimmunolo\* OR neuro NEXT immunolo\* OR growth NEXT factor\* OR (brain NEXT deriv\* NEAR/3 neurotroph\* NEXT factor\*) OR neurotrophin\* NEXT gene\* OR IGF1 OR IGF NEXT 1 OR vasculotropin\* OR VEGF OR BDNF OR VBM OR BOLD NEXT signal\* OR (blood NEXT oxygen NEAR/3 level\* NEAR/3 dependent\*) OR volumetr\* OR (brain NEAR/3 (function\* OR asymmetry\* OR metabol\* OR structure\*)) OR (functional\* NEAR/3 connectiv\*) OR (event NEXT related NEAR/3 brain NEXT potential\*) OR ((emotion\* OR psycholog\*) NEAR/3 (intelligen\* OR adjustment\* OR regulation\*)) OR (social\* NEAR/3 (interacti\* OR connected\*)) OR (self NEXT/1 (esteem OR control\* OR acceptan\* OR awareness\* OR concept OR efficac\*)) OR (psychologic\* NEAR/3 need\*) OR autonom\* OR belongingness\* OR (perceived NEAR/3 abilit\*) OR (confidence NOT (confidence NEXT interval\*)):ab,ti) NOT (patient\* OR athlete\* OR breathing OR disease\* OR Alzheimer\* OR Parkinson\* OR osteoarthritis\* OR cancer OR neoplas\* OR stroke OR cva OR cerebrovascular OR cardiovascular OR musculoskeletal OR pain OR disorder\* OR surger\* OR transplant\* OR survivor\* OR diabet\* OR injur\*):ti

### Web of Science Core Collection

TS=(((physical\* OR motor\* OR psychomotor\*) NEAR/2 (activit\*)) OR exercise\* OR sport\* OR (physical NEAR/2 (education OR training)) OR locomotion\* OR (Endurance NEAR/2 Training) OR walking OR running OR jogging OR yoga OR taichi OR tai-chi OR martial-art\* OR qigong OR ((aerobic OR resistance OR physical\*) NEAR/2 training))) AND ((depressi\* OR anxiet\* OR (somatic\* NEAR/2 symptom\*) OR (attention NEAR/2 deficit NEAR/2 (disorder\* OR hyperactiv\* OR problem\*)) OR (hyperactivit\* NEAR/2 problem\*) OR adhd OR internalizing OR internalization\* OR internalising OR internalisation\* OR externalizing OR externalization\* OR externalising OR externalisation\* OR (conduct NEAR/2 (disorder\* OR problem\*)) OR (rule\* NEAR/2 breaking NEAR/2 behav\*) OR ((disrupt\* OR problem\*) NEAR/2 behav\*))) AND ((mri OR (magnetic NEAR/2 resonance) OR (diffusion NEAR/2 tensor NEAR/2 imag\*) OR electroencephalogra\* OR eeg OR ((grey OR gray OR white) NEAR/1 matter\*) OR (nervous-system\* NEAR/2 development\*) OR neurogenesis\* OR ((nerv\*-cell\* OR Neuron\*) NEAR/2 plasticit\*) OR hormon\* OR peptide\* OR protein\* OR neurotransmitter\* OR opiate\* OR opioid\* OR serotonin\* OR noradrenalin\* OR norepinephrin\* OR dopamin\* OR monoamin\* OR endorphin\* OR neuroimmunolo\* OR neuro-immunolo\* OR growth-factor\* OR (brain-deriv\* NEAR/2 neurotroph\*-factor\*) OR neurotrophin\*-gene\* OR IGF1 OR IGF-1 OR vasculotropin\* OR VEGF OR BDNF OR VBM OR BOLD-signal\* OR (blood-oxygen NEAR/2 level\* NEAR/2 dependent\*) OR volumetr\* OR (brain NEAR/2 (function\* OR asymmetry\* OR metabol\* OR

structure\*) OR (functional\* NEAR/2 connectiv\*) OR (event-related NEAR/2 brain-potential\*) OR ((emotion\* OR psycholog\*) NEAR/2 (intelligen\* OR adjustment\* OR regulation\*)) OR (social\* NEAR/2 (interacti\* OR connected\*)) OR (self NEAR/1 (esteem OR control\* OR acceptan\* OR awareness\* OR concept OR efficac\*)) OR (psychologic\* NEAR/2 need\*) OR autonom\* OR belongingness\* OR (perceived NEAR/2 abilit\*) OR (confidence NOT (confidence-interval\*))) AND ((intervention\* OR trial\* OR random\* OR rct OR prospective\* OR longitudinal\* OR cohort\* OR follow-up\* OR cross-section\*)) NOT TI=(patient\* OR athlete\* OR breathing OR disease\* OR Alzheimer\* OR Parkinson\* OR osteoarthritis\* OR cancer OR neoplas\* OR stroke OR cva OR cerebrovascular OR cardiovascular OR musculoskeletal OR pain OR disorder\* OR surger\* OR transplant\* OR survivor\* OR diabet\* OR injur\* OR (systematic\* NEAR/3 review\*) OR meta-analys\* OR case-report\*) AND DT=(article) AND LA=(english)
